# Supplementary material
Source: publisher figshare collection journal article supplement (https://acs.figshare.com/ndownloader/files/9476857)
Supplement: Supplementary file 1 [file 9476857]

## **Supporting Information**

### **Catalytic fast pyrolysis of cellulose and biomass to selectively produce levoglucosenone using activated carbon catalyst**

Xiao-ning Ye, Qiang Lu\*, Xin Wang, Hao-qiang Guo, Min-shu Cui, Chang-qing Dong\*,  
Yong-ping Yang

National Engineering Laboratory for Biomass Power Generation Equipment, North China  
Electric Power University, No. 2 Beinong Road, Changping District, Beijing 102206, China

\*E-mail: qianglu@mail.ustc.edu.cn, cqdong1@163.com

Number of Pages: 9;

Number of figures: 6;

Number of tables: 2.

Table S1 The textural properties of the AC catalysts

|                                      | AC-P | AC-H <sub>2</sub> O | AC-CO <sub>2</sub> | AC-Zn | AC-P <sub>R</sub> | AC-P <sub>R</sub> <sup>*</sup> |
|--------------------------------------|------|---------------------|--------------------|-------|-------------------|--------------------------------|
| BET surface area (m <sup>2</sup> /g) | 1189 | 872                 | 502                | 937   | 988               | 316                            |
| Pore volume (cm <sup>3</sup> /g)     | 0.74 | 0.57                | 0.36               | 0.78  | 0.72              | 0.31                           |
| Average pore diameter (nm)           | 3.51 | 2.66                | 2.89               | 3.33  | 3.48              | 2.53                           |

\* After the sixth run in the recycling experiments.

Table S2 Composition of non-condensable gas products from lab-scale catalytic fast pyrolysis of cellulose under different temperatures and AC-P-to-cellulose ratios

| AC-P-to-cellulose<br>ratio | Temperature | H <sub>2</sub> | CH <sub>4</sub> | CO    | CO <sub>2</sub> |
|----------------------------|-------------|----------------|-----------------|-------|-----------------|
|                            | °C          | vol%           | vol%            | vol%  | vol%            |
| 1/5                        | 270         | 0.36           | 1.12            | 32.03 | 63.97           |
|                            | 300         | 0.36           | 1.55            | 34.12 | 61.03           |
|                            | 330         | 0.51           | 2.23            | 35.49 | 58.44           |
|                            | 360         | 0.59           | 2.65            | 39.15 | 54.16           |
|                            | 390         | 0.72           | 2.98            | 39.71 | 52.82           |
|                            | 420         | 1.11           | 4.31            | 52.74 | 37.31           |
| 0                          |             | 0.03           | 0.22            | 25.82 | 70.36           |
| 1/10                       |             | 0.12           | 0.52            | 33.23 | 63.14           |
| 1/5                        |             | 0.36           | 1.55            | 34.12 | 61.03           |
| 1/4                        | 300         | 0.44           | 1.74            | 34.73 | 60.37           |
| 1/3                        |             | 0.44           | 1.79            | 34.96 | 60.33           |
| 1/2                        |             | 0.40           | 1.77            | 35.49 | 60.21           |
| 1/1                        |             | 0.37           | 0.99            | 35.21 | 61.33           |

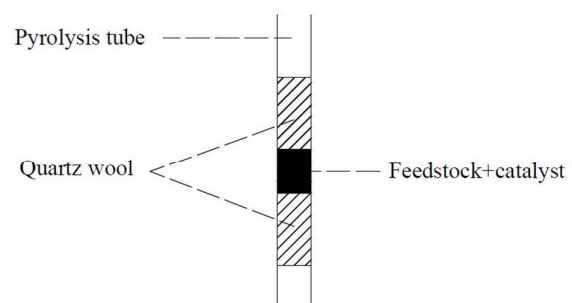

Fig. S1 Experimental sample preparation

The actual yield of LGO was determined individually by the external standard method (external calibration). When different amounts of LGO were subjected to GC/MS to record the peak area values, a straight line (calibration curve) could be obtained in terms of the LGO quantity and its chromatographic peak area value. Based on this calibration line and the feedstock quantity, the actual LGO yields under different reaction conditions could be calculated.

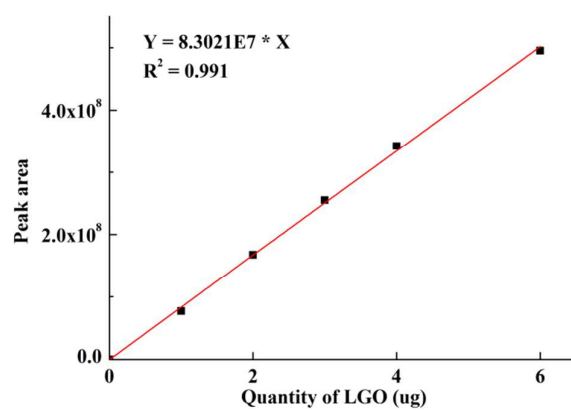

Fig. S2 Calibration curve of LGO

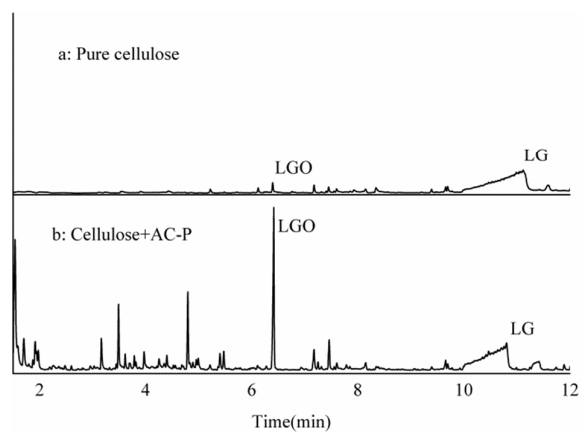

Fig. S3 Typical ion chromatograms of cellulose pyrolysis

(a) non-catalytic pyrolysis at 300 °C; (b) catalytic pyrolysis at 500 °C (AC-P-to-cellulose of  
1/3)

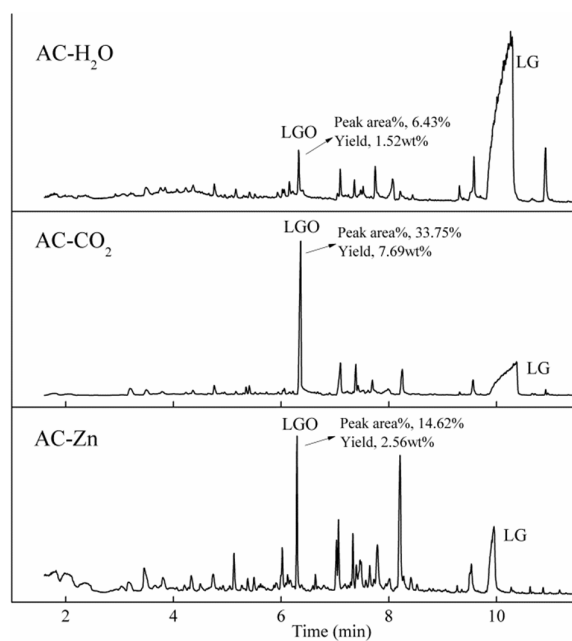

Fig. S4 Typical ion chromatograms of cellulose catalytic pyrolysis with different ACs at 300 °C and AC-to-cellulose ratio of 1/3

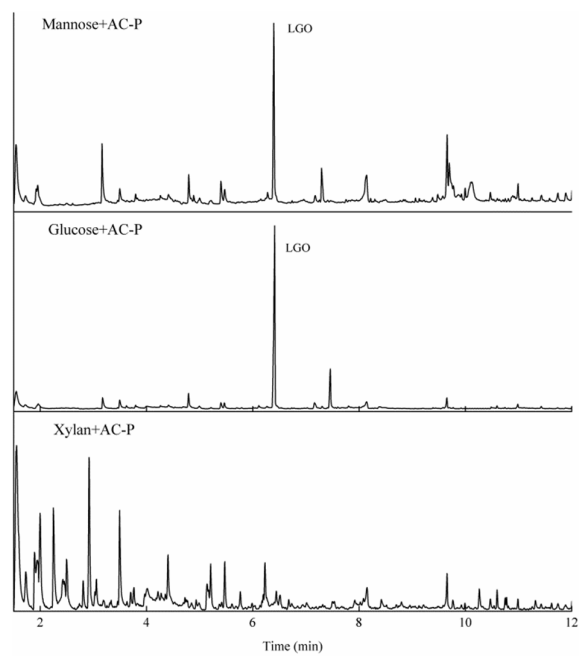

Fig. S5 Typical ion chromatograms of catalytic fast pyrolysis of mannose, glucose and xylan with AC-P at 300 °C



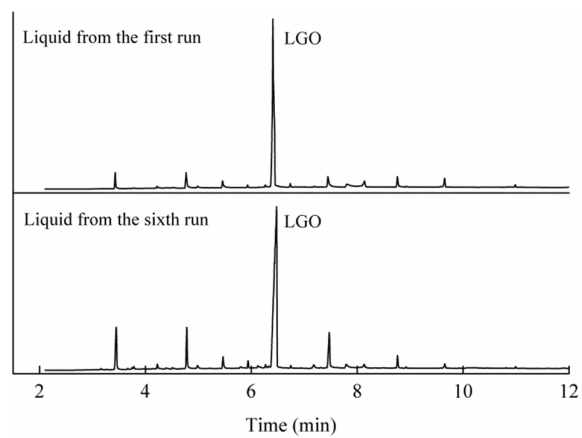

Fig. S6 Typical ion chromatograms from GC/MS analysis of the pyrolytic liquid products obtained in the recycling experiments
